# Supplementary material for: Enzyme-free ultrasensitive fluorescence detection of epithelial cell adhesion molecules based on a toehold-aided DNA recycling amplification strategy
Source: Royal Society of Chemistry journal article supplement (doi:10.1039/c8ra01362d), 2018-01-01
Supplement: c8ra01362d1.pdf [file c8ra01362d1.pdf]

Electronic supplementary information for RSC Advances

**Enzyme-free ultrasensitive fluorescence detection of  
epithelial cell adhesion molecule based on toehold-aided  
DNA recycling amplification strategy**

*Jishun Chen<sup>#</sup>, Bing Shang<sup>#</sup>, Hua Zhang, Zhengpeng Zhu, Long Chen, Hongmei*

*Wang, Fengying Ran, Qinhua Chen\*, Jun Chen\**

*Affiliated Dongfeng Hospital, Hubei University of Medicine, Hubei Shiyan 442008,  
China*

**Jishun Chen and Bing Shang are all the first authors.**

**Qinhua Chen and Jun Chen are all the corresponding authors. E-mail address:  
[cqh77@163.com](mailto:cqh77@163.com) (Q. Chen)**

### Native polyacrylamide gel electrophoresis

The different DNA mixed solutions were analyzed in 12% polyacrylamide gel. Electrophoretic analysis was carried out in  $1 \times$  TBE by DYCZ-25D electrophoretic apparatus at a constant voltage of 75 V for 100 min. The gel was stained by GelRed.

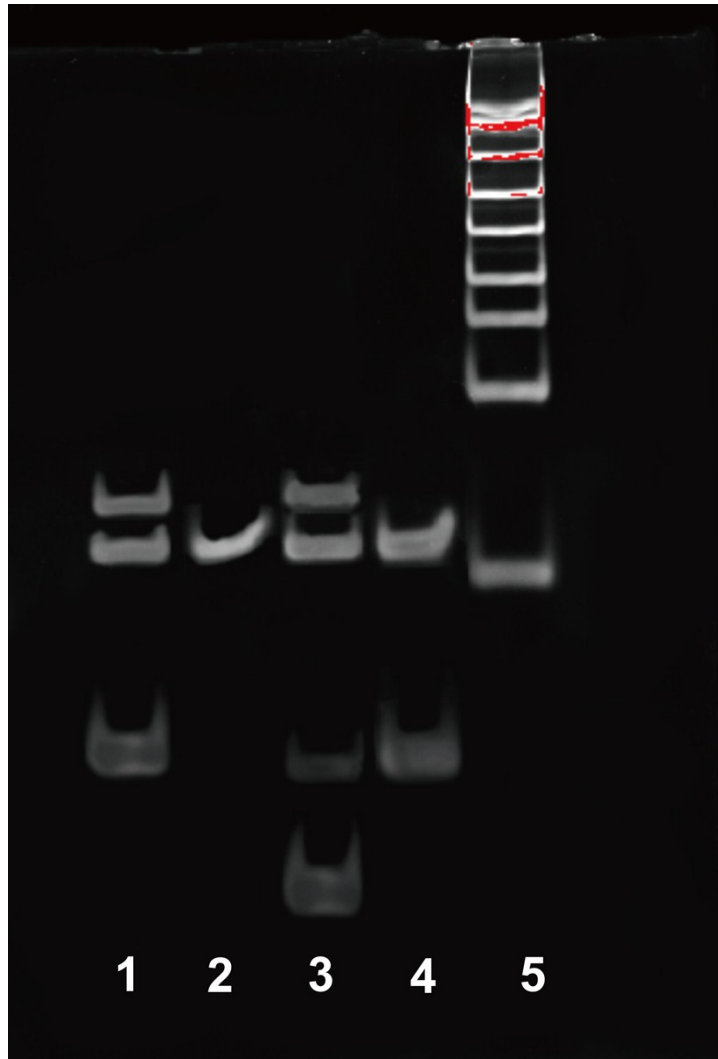

**Fig. S1** native 12% polyacrylamide gel electrophoresis, lane 1: aptamer/strand a + strand b + strand c + strand d + strand e; lane 2: strand b + strand c+ strand d; lane 3: aptamer/strand a + strand b+ strand c+ strand d+ strand e + EpCAM; lane 4: strand b+ strand c + strand d + strand e; lane 5: marker.
